# Supplementary material
Source: PubMed Central journal article supplement (PMC8818810)
Supplement: NIHMS1733304-supplement-2.pdf [file NIHMS1733304-supplement-2.pdf]

# **TREM2 is thyroid hormone regulated making the TREM2 pathway druggable with ligands for thyroid hormone receptor**

Skylar J. Ferrara<sup>1</sup>, Priya Chaudhary<sup>2,4</sup>, Margaret J. DeBell<sup>1</sup>, Gail Marracci<sup>2,4</sup>, Hannah Miller<sup>1</sup>, Evan Calkins<sup>2,4</sup>, Edvinas Pocius<sup>2,4</sup>, Brooke A. Napier<sup>3</sup>, Ben Emery<sup>4,5</sup>, Dennis Bourdette<sup>2,4</sup>, and Thomas S. Scanlan<sup>1</sup>

<sup>1</sup>Department of Chemical Physiology and Biochemistry and Program in Chemical Biology, Oregon Health & Science University, Portland, Oregon, USA. <sup>2</sup>VA Portland Health Care System, Portland, Oregon, USA. <sup>3</sup>Department of Biology, Portland State University, Oregon, USA.

<sup>4</sup>Department of Neurology, and <sup>5</sup>Jungers Center for Neurosciences Research, Oregon Health & Science University, Portland, Oregon, USA.

## **Lead Contact:**

Thomas S. Scanlan, Department of Chemical Physiology and Biochemistry, L334; 3181 SW Sam Jackson Park Road, Oregon Health & Science University, Portland, OR 97239, USA.  
Phone: 503.494.9292; email: scanlant@ohsu.edu

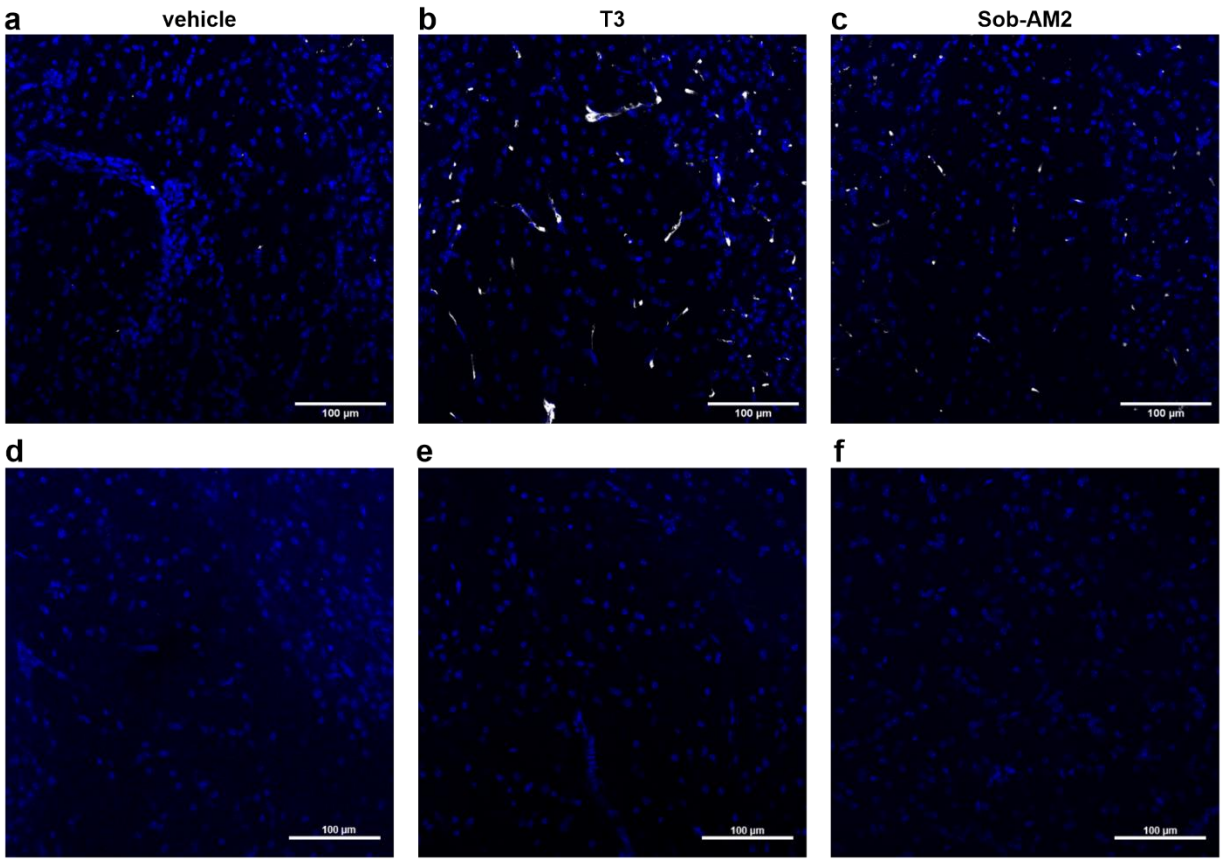

**Supplemental Figure S1, Related to Figure 5: (a-c)** DAPI and TREM2 co-staining for the representative images in Fig. 5. **(d-f)** No primary controls for each group showing DAPI and TREM2 channels. Scale bars: 100 µm.

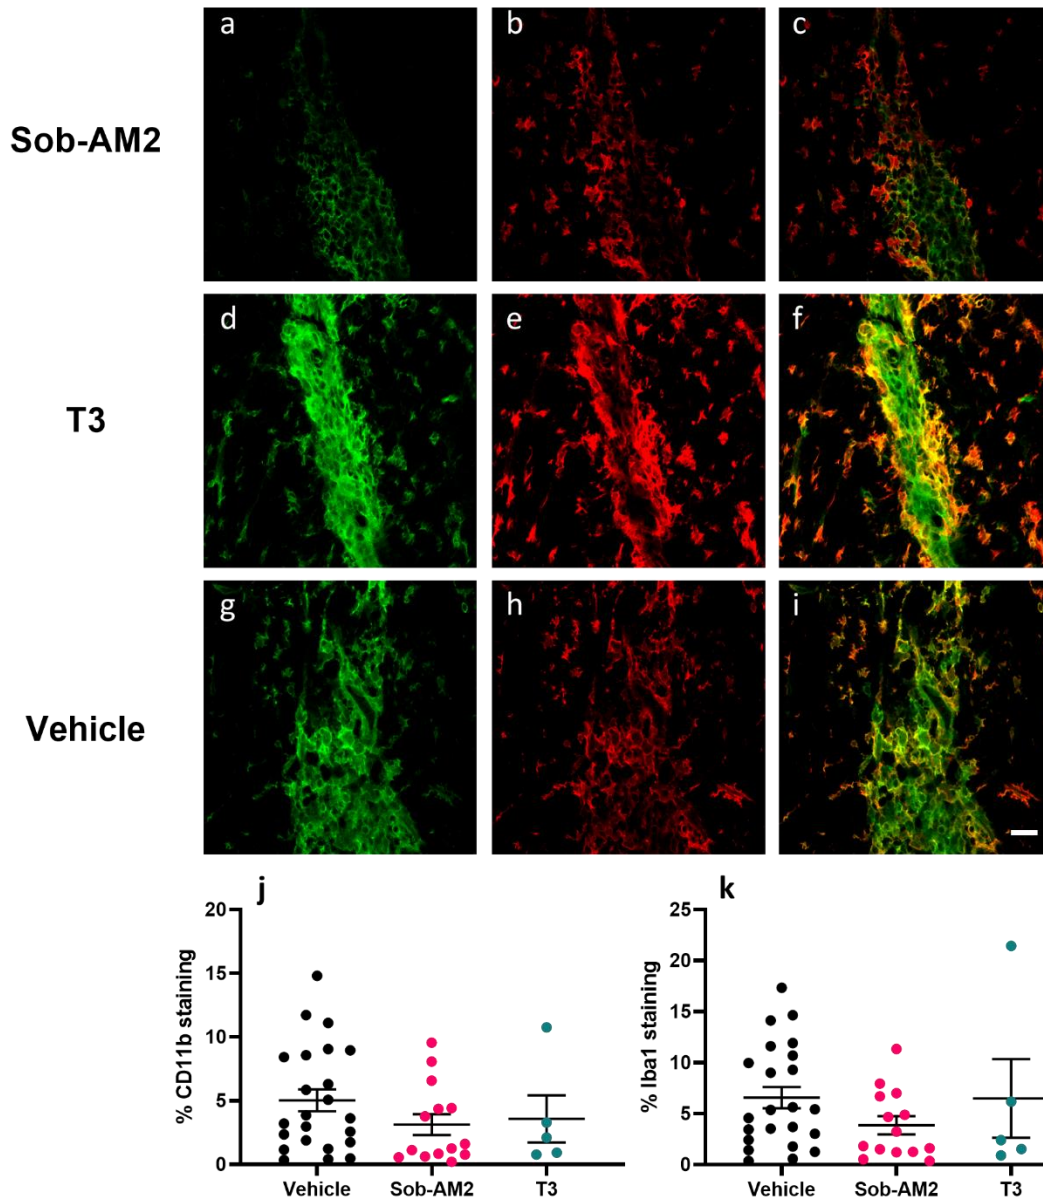

**Supplemental Figure S2, Related to Figure 5:** Representative CD11b (green) and Iba1 (red) staining of dorsal spinal cord sections from Sob-AM2 (**a-c**, 1 mg/kg), T3 (**d-f**, 0.4 mg/kg), and vehicle (**g-i**, DMSO and NaOH) treated mice. Quantification of percent CD11b staining (**j**) and Iba1 staining (**k**) from each representative group. There is no statistically significant difference between any group in **j** and **k** as determined by one-way ANOVA ( $P < 0.05$ ) and Mann-Whitney U tests between vehicle and specific group. Scale bar is 20  $\mu\text{m}$ .

**Table S1, Related to Figures 2 and 3: Oligonucleotide sequences used for RT-qPCR. All oligonucleotides were purchased from Eurofins Genomics.**

|                                              |
|----------------------------------------------|
| Oligonucleotides                             |
| f- <i>Ppia</i> 5'-AGGGTGGTGACTTTACACGC-3'    |
| r- <i>Ppia</i> 5'-CTTGCCATCCAGCCATTCAG-3'    |
| f- <i>Trem2</i> 5'-GACCTCTCCACCAGTTTCTCC-3'  |
| r- <i>Trem2</i> 5'-TACATGACACCCTCAAGGACTG-3' |
| f- <i>Cd68</i> 5'-TTCTGCTGTGGAAATGCAAG-3'    |
| r- <i>Cd68</i> 5'-GAGAAACATGGCCCGAAGT-3'     |
| f- <i>I11b</i> 5'-TCCAGGATGAGGACATGAGCAC-3'  |
| r- <i>I11b</i> 5'-GAACGTCACACACCAGCAGGTTA-3' |
| f- <i>I16</i> 5'-GTTGCCTTCTTGGGACTGATG-3'    |
| r- <i>I16</i> 5'-CATACAATCAGAATTGCCATTGC-3'  |
| f- <i>GAPDH</i> 5'-CAGGAGGCATTGCTGATGAT-3'   |
| r- <i>GAPDH</i> 5'-GAAGGCTGGGGCTCATT-3'      |
| f- <i>TREM2</i> 5'-ACAGAAGCCAGGGACACATC-3'   |
| r- <i>TREM2</i> 5'-CCTCCCATCATCTTCCTTCA-3'   |
